# Supplementary material
Source: PubMed Central journal article supplement (PMC6871030)
Supplement: 41587_2018_BFnbt4109_MOESM24_ESM.pdf [file 41587_2018_BFnbt4109_MOESM24_ESM.pdf]

**Supplementary Table 1: Throughput for each of the BAC runs.**

| <b>BAC ID</b> | <b>Type</b>               | <b># reads</b> | <b>Yield (Mb)</b> | <b>Selected Full-length Range (kb)</b> | <b># reads</b> | <b>Yield (Mb)</b> | <b>Consensus length (bp)</b> |
|---------------|---------------------------|----------------|-------------------|----------------------------------------|----------------|-------------------|------------------------------|
| 108I14        | Control Yp-arm (Yp11.2)   | 4966           | 220               | 75-85                                  | 1686           | 135               | 80653                        |
| 531P03        | DYZ3 array; unknown order | 19620          | 174               | 155-175                                | 251            | 41                | 165830                       |
| 808M02        | DYZ3 array; unknown order | 21936          | 87                | 140-180                                | 144            | 22                | 149351                       |
| 1226J10       | Yq-arm+HSATIII            | 23137          | 716               | 150-170                                | 689            | 111               | 161191                       |
| 909C13        | DYZ3 array; unknown order | 24710          | 969               | 160-180                                | 400            | 69                | 175340                       |
| 744B15        | DYZ3 array; unknown order | 348            | 24                | 180-200                                | 51             | 10                | 194752                       |
| 890C20        | DYZ3 array; unknown order | 1221           | 76                | 180-195                                | 118            | 22                | 190388                       |
| 648J16        | DYZ3 array; unknown order | 5485           | 217               | 190-200                                | 200            | 39                | 198027                       |
| 718M18        | DYZ3 array; unknown order | 34354          | 1239              | 200-220                                | 525            | 110               | 210001                       |
| 482A22        | Control (Xq24)            | 3437           | 177               | 150-200                                | 370            | 62                | 170373                       |

**SUPPLEMENTARY REFERENCES:**

1. Tyler-Smith, C. & Brown, W. R. Structure of the major block of alphoid satellite DNA on the human Y chromosome. *J. Mol. Biol.* **195**, 457–470 (1987).
2. Tyler-Smith, C. Structure of repeated sequences in the centromeric region of the human Y chromosome. *Development* **101 Suppl**, 93–100 (1987).
3. Wayne, J. S. & Willard, H. F. Nucleotide sequence heterogeneity of alpha satellite repetitive DNA: a survey of alphoid sequences from different human chromosomes. *Nucleic Acids Res.* **15**, 7549–7569 (1987).

4. Politi, V. *et al.* CENP-C binds the alpha-satellite DNA in vivo at specific centromere domains. *J. Cell Sci.* **115**, 2317–2327 (2002).
5. Warburton, P. E. *et al.* Immunolocalization of CENP-A suggests a distinct nucleosome structure at the inner kinetochore plate of active centromeres. *Curr. Biol.* **7**, 901–904 (1997).
6. Black, B. E. & Cleveland, D. W. Epigenetic centromere propagation and the nature of CENP-a nucleosomes. *Cell* **144**, 471–479 (2011).
7. Levy, S. *et al.* The diploid genome sequence of an individual human. *PLoS Biol.* **5**, e254 (2007).
8. Miga, K. H. *et al.* Centromere reference models for human chromosomes X and Y satellite arrays. *Genome Res.* **24**, 697–707 (2014).
9. Henikoff, J. G., Thakur, J., Kasinathan, S. & Henikoff, S. A unique chromatin complex occupies young  $\alpha$ -satellite arrays of human centromeres. *Sci Adv* **1**, (2015).
10. Hayden, K. E. *et al.* Sequences associated with centromere competency in the human genome. *Mol. Cell. Biol.* **33**, 763–772 (2013).
